# Supplementary material
Source: MDPI journal article supplement (https://www.mdpi.com/search?q=microorganisms-08-01157)
Supplement: s001 [file microorganisms-08-01157-s001.pdf]

Table S1. Key biochemical tests used for identification of *S. argenteus* (N = 96).

| Biochemical Test <sup>a</sup> | ST Type (No. of Positive Isolates) |             |             |            | No. (Positive Rate, %) |
|-------------------------------|------------------------------------|-------------|-------------|------------|------------------------|
|                               | ST2250 (72)                        | ST2793 (12) | ST1223 (10) | ST2198 (2) |                        |
| AMY                           | 1                                  | 0           | 0           | 1          | 2 (2.1%)               |
| APPA                          | 0                                  | 0           | 0           | 0          | 0 (0%)                 |
| LeuA                          | 0                                  | 0           | 0           | 1          | 1 (1.0%)               |
| AlaA                          | 0                                  | 0           | 0           | 0          | 0 (0%)                 |
| DRIB                          | 39                                 | 7           | 3           | 2          | 51 (53.1%)             |
| NOVO                          | 1                                  | 0           | 0           | 0          | 1 (1.0%)               |
| DRAF                          | 1                                  | 0           | 0           | 0          | 1 (1.0%)               |
| OPTO                          | 72                                 | 12          | 10          | 2          | 96 (100%)              |
| PIPLC                         | 0                                  | 0           | 0           | 0          | 0 (0%)                 |
| CDEX                          | 0                                  | 0           | 0           | 0          | 0 (0%)                 |
| ProA                          | 0                                  | 0           | 0           | 0          | 0 (0%)                 |
| TyrA                          | 0                                  | 0           | 0           | 0          | 0 (0%)                 |
| ILATk                         | 71                                 | 12          | 10          | 2          | 96 (100%)              |
| NC6.5                         | 72                                 | 12          | 10          | 2          | 96 (100%)              |
| O129R                         | 72                                 | 11          | 9           | 2          | 95 (99.0%)             |
| dXYL                          | 0                                  | 0           | 0           | 0          | 0 (0%)                 |
| AspA                          | 0                                  | 0           | 0           | 0          | 0 (0%)                 |
| BGURr                         | 0                                  | 0           | 0           | 0          | 0 (0%)                 |
| DSOR                          | 0                                  | 0           | 0           | 0          | 0 (0%)                 |
| LAC                           | 2                                  | 0           | 0           | 0          | 2 (2.1%)               |
| DMAN                          | 72                                 | 12          | 10          | 2          | 96 (100%)              |
| SAL                           | 1                                  | 2           | 4           | 0          | 7 (7.3%)               |
| ADH1                          | 72                                 | 12          | 10          | 2          | 96 (100%)              |
| BGAR                          | 0                                  | 0           | 0           | 0          | 0 (0%)                 |
| AGAL                          | 4                                  | 3           | 1           | 0          | 8 (8.3%)               |
| URE                           | 49                                 | 8           | 3           | 2          | 62 (64.6%)             |
| NAG                           | 2                                  | 0           | 0           | 0          | 2 (2.1%)               |
| DMNE                          | 72                                 | 12          | 9           | 2          | 95 (99.0%)             |
| SAC                           | 72                                 | 12          | 9           | 2          | 95 (99.0%)             |
| BGAL                          | 24                                 | 0           | 0           | 1          | 25 (26.0%)             |
| AMAN                          | 0                                  | 0           | 0           | 1          | 1 (1.0%)               |
| PyrA                          | 71                                 | 12          | 9           | 2          | 94 (98.0%)             |
| POLYB                         | 60                                 | 11          | 9           | 2          | 82 (85.4%)             |
| DMAL                          | 72                                 | 12          | 10          | 2          | 96 (100%)              |
| MBdG                          | 71                                 | 12          | 10          | 2          | 95 (99.0%)             |
| dTRE                          | 72                                 | 12          | 10          | 2          | 96 (100%)              |
| AGLU                          | 69                                 | 5           | 5           | 2          | 81                     |
| PHOS                          | 71                                 | 12          | 10          | 2          | 95 (99.0%)             |
| BGUR                          | 0                                  | 0           | 0           | 0          | 0 (0%)                 |
| DGAL                          | 63                                 | 10          | 7           | 2          | 82                     |
| BACL                          | 71                                 | 11          | 10          | 2          | 94                     |
| PUL                           | 0                                  | 0           | 0           | 0          | 0 (0%)                 |
| ADH2S                         | 50                                 | 8           | 4           | 2          | 64 (66.7%)             |

<sup>a</sup> Abbreviation table of Biochemical tests for Vitek 2 GP ID card.

| Abbre. | Test                    | Abbre. | Test                     |
|--------|-------------------------|--------|--------------------------|
| AMY    | D-amygdalin             | SAL    | Salicin                  |
| APPA   | Ala-phe-pro arylamidase | ADH1   | Arginine dihydrolase I   |
| LeuA   | Leucine arylamidase     | BGAR   | Beta galactopyranosidase |
| AlaA   | Alanine arylamidase     | AGAL   | Alpha-galactosidase      |
| DRIB   | D-ribose                | URE    | Urease                   |
| NOVO   | Novobiocin resistance   | NAG    | N-acetyl-D-glucosamine   |

|              |                                      |              |                            |
|--------------|--------------------------------------|--------------|----------------------------|
| <b>DRAF</b>  | D-raffinose                          | <b>DMNE</b>  | D-mannose                  |
| <b>OPTO</b>  | Optochin resistance                  | <b>SAC</b>   | Saccharose/sucrose         |
| <b>PIPLC</b> | Phosphatidylinositol phospholipase C | <b>BGAL</b>  | Beta-galactosidase         |
| <b>CDEX</b>  | Cyclodextrin                         | <b>AMAN</b>  | Alpha-mannosidase          |
| <b>ProA</b>  | L-proline arylamidase                | <b>PyrA</b>  | L-pyrrolidonyl-arylamidase |
| <b>TyrA</b>  | Tyrosine arylamidase                 | <b>POLYB</b> | Polymixin b resistance     |
| <b>ILATk</b> | L-LACTATE alkalization               | <b>dMAL</b>  | D-maltose                  |
| <b>NC6.5</b> | Growth in 6.5% NaCl                  | <b>MBdG</b>  | Methyl-B-D-glucopyranoside |
| <b>O129R</b> | O/129 resistance<br>(comp.vibrio.)   | <b>dTRE</b>  | D-trehalose                |
| <b>dXYL</b>  | D-xylose                             | <b>AGLU</b>  | Alpha-glucosidase          |
| <b>AspA</b>  | L-aspartate arylamidase              | <b>PHOS</b>  | Phosphatase                |
| <b>BGURr</b> | Beta glucuronidase                   | <b>BGUR</b>  | Beta-glucuronidase         |
| <b>DSOR</b>  | D-sorbitol                           | <b>DGAL</b>  | D-galactose                |
| <b>LAC</b>   | Lactose                              | <b>BACL</b>  | Bacitracin resistance      |
| <b>DMAN</b>  | D-mannitol                           | <b>PUL</b>   | Pullulan                   |
|              |                                      | <b>ADH2S</b> | Arginine dihydrolase 2     |

Table S2. Partial *dnaJ* (889bp) nucleotide and amino acid sequence similarities.

| Strain No. | Strain (Accession No.)                          | % <i>dnaJ</i> Sequence Similarity <sup>a</sup> (Differences) with Strain : |           |           |           |           |         |         |
|------------|-------------------------------------------------|----------------------------------------------------------------------------|-----------|-----------|-----------|-----------|---------|---------|
|            |                                                 | 1                                                                          | 2         | 3         | 4         | 5         | 6       | 7       |
| 1          | <i>S.ag.</i> MSHR1132<br>(ST1850)(NC016941)     | -                                                                          | 99.7(1)   | 100(0)    | 100(0)    | 100(0)    | 97.6(7) | 97.6(7) |
| 2          | <i>S.ag.</i> NTUH_9546-1<br>(ST2250) (MT542641) | 99.9(1)                                                                    | -         | 99.7(1)   | 99.7(1)   | 99.7(1)   | 97.3(8) | 97.3(8) |
| 3          | <i>S.ag.</i> NTUH_8694<br>(ST2793) (MT542655)   | 99.9(1)                                                                    | 99.8(2)   | -         | 99.7(0)   | 100(0)    | 97.6(7) | 97.6(7) |
| 4          | <i>S.ag.</i> NTUH_2423<br>(ST1223) (MT542647)   | 99.7(3)                                                                    | 99.6(4)   | 99.6(4)   | -         | 100(0)    | 97.6(7) | 97.6(7) |
| 5          | <i>S.ag.</i> NTUH_4882<br>(ST2198) (MT542651)   | 99.9(1)                                                                    | 99.8(2)   | 99.8(2)   | 99.6(4)   | -         | 97.6(7) | 97.6(7) |
| 6          | <i>S.a.</i> N315<br>(ST5) (NC002745)            | 88.5(102)                                                                  | 88.4(103) | 88.6(101) | 88.8(100) | 88.4(103) | -       | 100(0)  |
| 7          | <i>S.a.</i> DSM20231<br>(ST8) (CP011526)        | 88.4(103)                                                                  | 88.3(104) | 88.5(102) | 88.6(101) | 88.3(104) | 99.9(1) | -       |

<sup>a</sup>: Data in the upper right portion of the table body indicate nucleotide sequence similarities, and data in the lower left portion of the table body indicate amino acid sequence similarities.

Table S3. Partial groEL (780bp) nucleotide and amino acid sequence similarities.

| Strain No. | Strain (Accession No.)                         | % GroEL Sequence Similarity <sup>a</sup> (Differences) with Strain : |          |          |          |          |          |         |
|------------|------------------------------------------------|----------------------------------------------------------------------|----------|----------|----------|----------|----------|---------|
|            |                                                | 1                                                                    | 2        | 3        | 4        | 5        | 6        | 7       |
| 1          | <i>S.ag.</i> MSHR1132<br>(ST1850)(NC016941)    | -                                                                    | 100(0)   | 100(0)   | 100(0)   | 100(0)   | 99.6(1)  | 99.6(1) |
| 2          | <i>S.ag.</i> NTUH_9546-1<br>(ST2250)(MT542642) | 98.1(15)                                                             | -        | 100(0)   | 100(0)   | 100(0)   | 99.6(1)  | 99.6(1) |
| 3          | <i>S.ag.</i> NTUH_8694<br>(ST2793)(MT542656)   | 98.5(12)                                                             | 98.8(9)  | -        | 100(0)   | 100(0)   | 99.6(1)  | 99.6(1) |
| 4          | <i>S.ag.</i> NTUH_2423<br>(ST1223)(MT542648)   | 99.7(2)                                                              | 97.8(17) | 98.5(12) | -        | 100(0)   | 99.6(1)  | 99.6(1) |
| 5          | <i>S.ag.</i> NTUH_4882<br>(ST2198)(MT542652)   | 98.7(10)                                                             | 98.1(15) | 99.0(8)  | 98.7(10) | -        | 99.6(1)  | 99.6(1) |
| 6          | <i>S.a.</i> N315<br>(ST5) (NC002745)           | 92.8(56)                                                             | 92.9(55) | 93.7(49) | 93.6(50) | 92.4(59) | -        | 100(0)  |
| 7          | <i>S.a.</i> DSM20231<br>(ST8) (CP011526)       | 92.8(56)                                                             | 93.0(54) | 93.3(52) | 92.8(56) | 92.4(59) | 98.7(10) | -       |

<sup>a</sup>: Data in the upper right portion of the table body indicate nucleotide sequence similarities, and data in the lower left portion of the table body indicate amino acid sequence similarities.

Table S4. Primers list for CRIPSR/cas.

| Primer Name                                   | Sequence (5'→3')            |
|-----------------------------------------------|-----------------------------|
| cas1 forward_MSHR1132_28-49                   | CATTACTTTGTTACCGTGAAAG      |
| cas1 Reverse_MSHR1132_28-49                   | CTTTCACGGTAACAAAGTAATG      |
| cas1 reverse_MSHR1132_880-899                 | CCCACCTCAATCATTTTAGG        |
| cas1 forward_MSHR1132_880-899                 | CCTAAAATGATTGAGGTGGG        |
| csm1 reverse_MSHR1132                         | CAGCCTCCCTTATTTGATAAAC      |
| cas1-R_574-595                                | CGAATCCATGTAAAGCTAGTTC      |
| Csm2-F                                        | GAAGAGGCAGAGAAAAACAAG       |
| Csm2-R                                        | CCTCCTTTTGATAATATTTAGCG     |
| Cmr4-F                                        | CTGGTTTACACATCGGTG          |
| Cmr4-R                                        | CTCCAACAACCTGTCTCG          |
| Csm4-F                                        | GGAAATGACAATAACGTCTG        |
| Csm4-R                                        | CATAGCGATAGACTGGATG         |
| Csm5-F                                        | GGTCCAGTTCATATTGGTAG        |
| Csm5-R                                        | CACATACCTTGCTGGTATG         |
| Csm6-F                                        | GAGATGGTGCAATGCTTC          |
| Csm6-R                                        | GTCTTGTTTCATCTATCTCAGG      |
| Cas6-F                                        | CATGGCGTGTTAATGGATTATC      |
| Cas6-R                                        | CCCATGCCTAAGCTTGT           |
| Csm6-R                                        | GTCTTGTTTCATCTATCTCAGG      |
| R_MSHR1132_hypothetical protein"71327..71596" | CGGGGTATTTATCGA ATACAG      |
| R_MSHR1132_reverse transcriptase_72125..73651 | CGCTATCATTAGCAAATATCC       |
| F_MSHR1132_DEAH box(hypo)_61019..61645        | CGAGGATGAAGGAAGAAG          |
| cas1-F_574-595                                | GAACTAGCTTTACATGGATTCC      |
| csm1-R2                                       | TCGTTGATATTCCTACACC         |
| csm1-endF                                     | CAAACAGATGAACACGGA          |
| csm4-endF                                     | CAACGGCAATGGCTAAAG          |
| cas2_endF                                     | GTGAGAAAAGAACCTAAGCT        |
| Y_csm5-endF                                   | CGATGAAAGTCATTTAGCGA        |
| orfX234F                                      | ACAAGGAAAGATGCTATYTTCC      |
| cas_up_hypo reverse 191-208                   | CCAAACATCAGGTTCTGC          |
| orfX-break2-F                                 | CTTCAATTTCTGCAGGCG          |
| out-end DEAD-R                                | ACGTACTGATTCATGGGATG        |
| R_MSHR1132_reverse transcriptase_72125..73651 | CGC TAT CAT TAG CAA ATA TCC |
| down-Cas6-endF                                | ACAAGCTTAGGCATGGG           |
| down-RT-R                                     | TCTAAAGGACGCCAATCA          |

Table S5. GenBank accession numbers in the present study.

| <i>S. argenteus</i> Clinical<br>Isolates (ST Type) | GenBank Accession No. |               |             |              |                    |
|----------------------------------------------------|-----------------------|---------------|-------------|--------------|--------------------|
|                                                    | <i>DnaJ</i>           | <i>GroESL</i> | <i>AgrD</i> | <i>CoaD1</i> | <i>CRISPR</i>      |
| NTUH_9546-1 (ST2250)                               | MT542641              | MT542642      | MT542643    | MT542644     |                    |
| NTUH_4415 (ST2250)                                 | KY995170              | KY995174      | -           | -            | MT542645           |
| 14 NTUH isolates (ST2250)                          | -                     | -             | -           | -            | MT542646           |
| NTUH_2423 (ST1223)                                 | MT542647              | MT542648      | MT542649    | MT542650     | MT542659-MT542686- |
| NTUH_1599 (ST1223)                                 | KY995171              | KY995175      | -           | -            | -                  |
| NTUH_4882 (ST2198)                                 | MT542651              | MT542652      | MT5426503   | MT542654     | -                  |
| NTUH_3702 (ST2198)                                 | KY995172              | KY995176      | -           | -            | -                  |
| NTUH_8694 (ST2793)                                 | MT542655              | MT542656      | MT542657    | MT542658     | -                  |
| NTUH_2246 (ST2793)                                 | KY995173              | KY995177      | -           | -            | -                  |
